# Supplementary material for: Uncovering Hierarchical Regulation among MYB-bHLH-WD40 Proteins and Manipulating Anthocyanin Pigmentation in Rice
Source: MDPI journal article supplement (doi:10.3390/ijms23158203), 2022-07-26
Supplement: s1 [file s1]

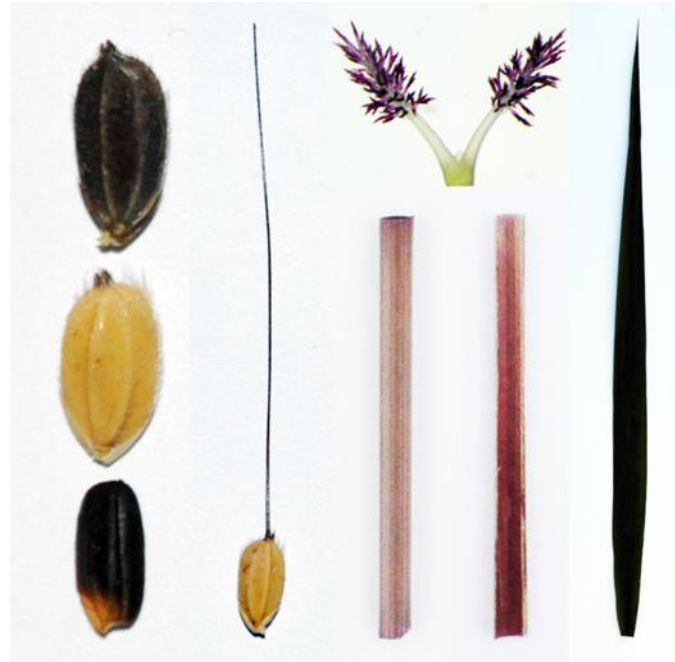

**Figure S1.** Anthocyanins pigmented organs in rice. From left to right: hull, apiculus, pericarp, awn, pistil, culm, leaf sheath, leaf blade.

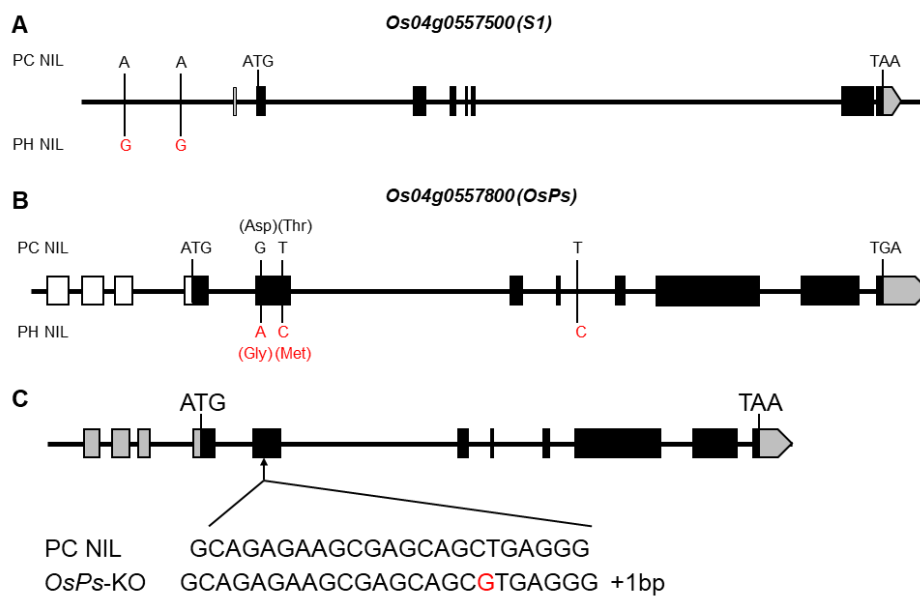

**Figure S2.** Schematic diagrams of gene structure. *S1* (A) and *OsPs* (B) show differences between PC NIL and PH NIL. (C) Knockout of *OsPs* by CRISPR/Cas9 system. A 'G' insertion in the second exon of the gene caused frame shift.

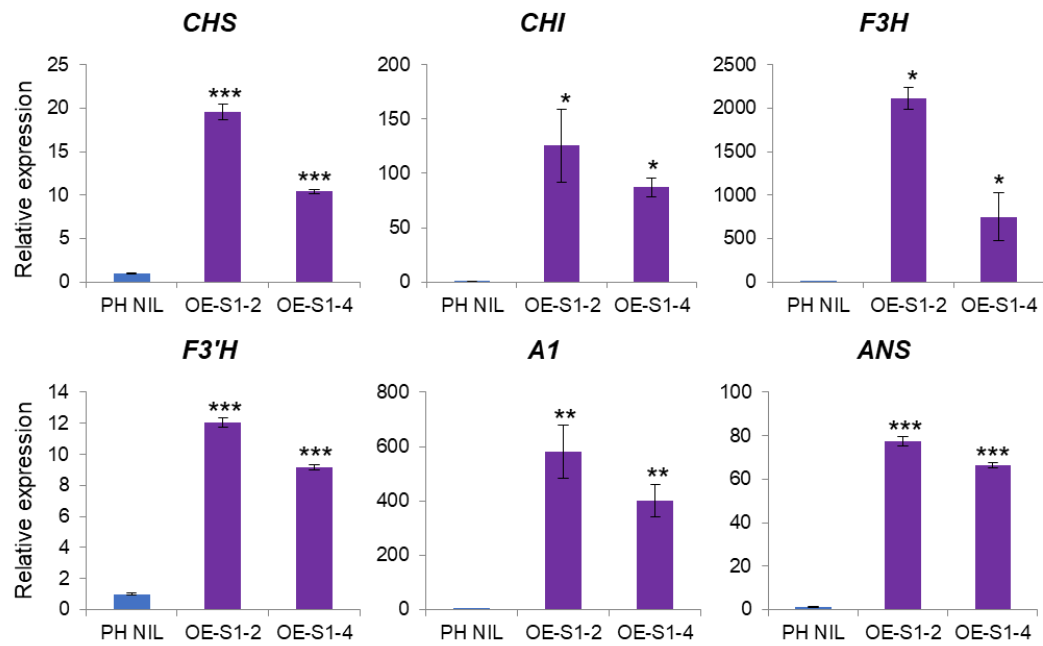

**Figure S3.** Expression of biosynthesis genes in *S1* overexpressed transgenic lines (OE-S1-2 and OE-S1-4). Data represent means  $\pm$  s.e.m (n=3 biological replicates). The asterisks indicate statistical significance by two-tailed Student's *t*-tests (\**P*<0.05, \*\**P*<0.01, \*\*\**P*<0.001).

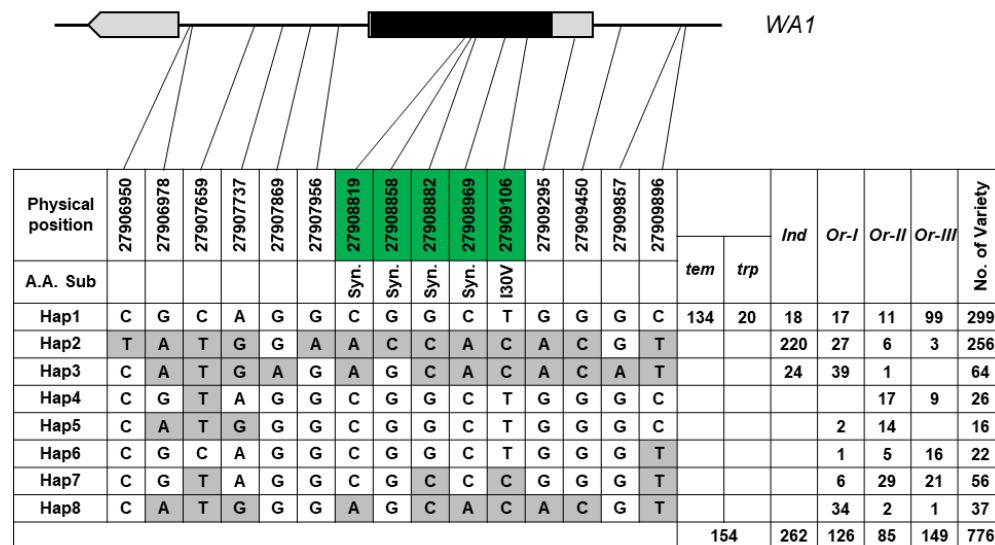

**Figure S4.** Haplotype of *WA1*. Syn., synonymous mutation.

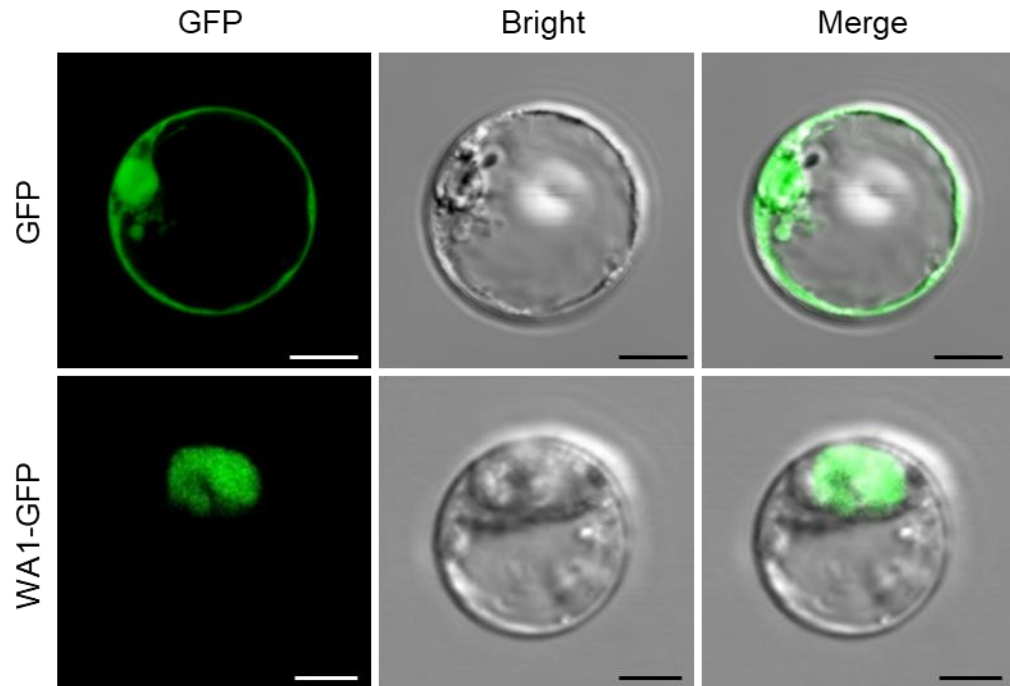

**Figure S5.** Sub-cellular localization of WA1 in rice protoplast. Bar=5  $\mu$ m.

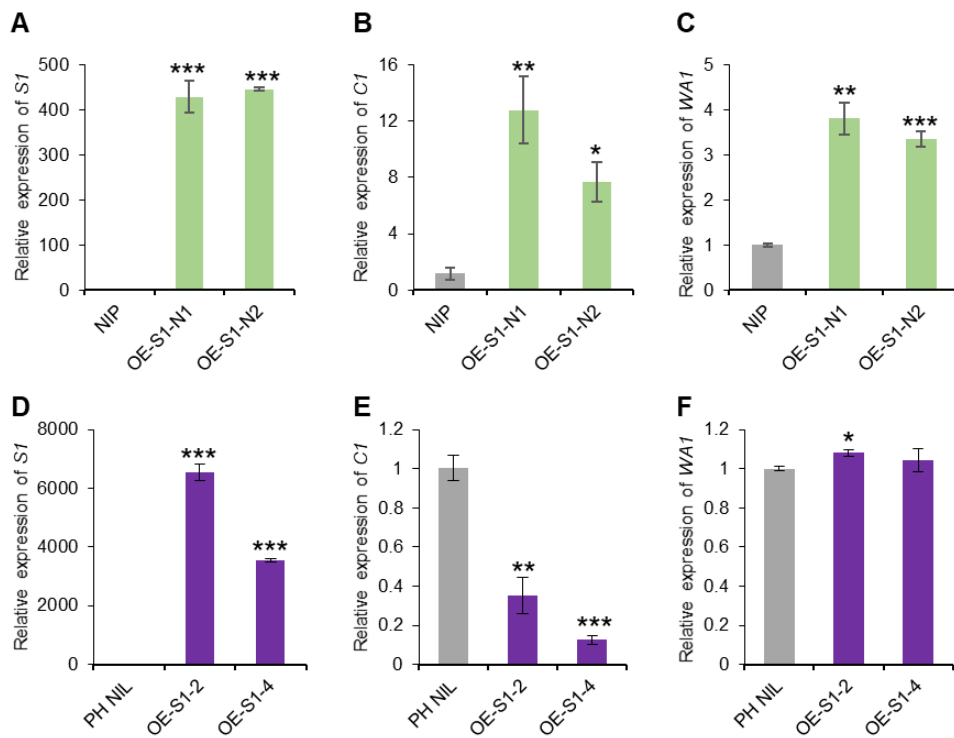

**Figure S6.** Expression of *S1*, *C1* and *WAI* in *S1* overexpressed transgenic lines. (A-C) *S1* overexpressed in Nipponbare. (D-F) *S1* overexpressed in PH NIL. Data represent means  $\pm$  s.e.m (n=3 biological replicates). The asterisks indicate statistical significance by two-tailed Student's *t*-tests (\* $P$ <0.05, \*\* $P$ <0.01, \*\*\* $P$ <0.001).

| Promoters                     | C1 binding motif   | S1 binding motif (CANNTG)      |
|-------------------------------|--------------------|--------------------------------|
| <i>proCHS</i> (Os11g0530600)  | CCAACC(-171)       | CACGTG(-262;-300)              |
| <i>proCHI</i> (Os03g0819600)  | CCAACC(-948)       | CACTTG(-900)                   |
| <i>proF3H</i> (Os04g0662600)  | CCTACC(-339)       | CAGGTG(-692)                   |
| <i>proF3'H</i> (Os10g0320100) | CCTACC(-126)       | CAGGTG(-228)                   |
| <i>proA1</i> (Os01g0633500)   | CCTACC(-470,-2017) | CACGTG(-2031)<br>/CAGGTG(-484) |
| <i>proANS</i> (Os01g0372500)  | CCTACC(-568)       | CACGTG(-212)                   |

**Figure S7.** Predicted binding sites of C1 and S1 in the promoter of structural genes.
